# Supplementary material for: The Cerato-Platanin EPL2 from Trichoderma reesei Is Not Directly Involved in Cellulase Formation but in Cell Wall Remodeling
Source: MDPI journal article supplement (doi:10.3390/microorganisms11081965), 2023-07-31
Supplement: s1 [file s1]

## Supplementary Material

# The Cerato-platanin EPL2 from *Trichoderma reesei* is directly involved not in cellulase formation but in cell wall remodeling

Alinne Costa Silva †, Letícia Harumi Oshiquiri †, Luiz Felipe de Moraes Costa de Jesus, David Batista Maués and Roberto N. Silva \*

Figure S1

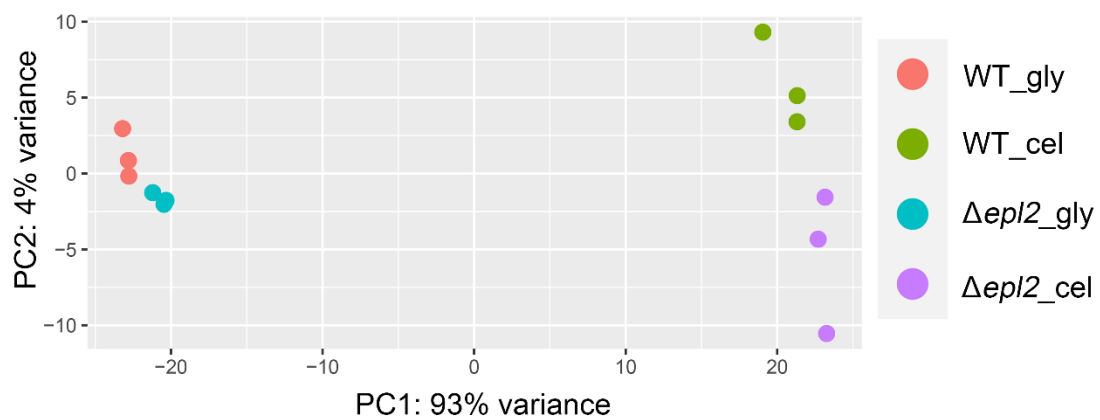

**Figure S1.** Principal component analysis (PCA) of the different conditions analyzed. WT represents the wild type *T. reesei* QM6a $\Delta$ tmus53 $\Delta$ pyr4 strain. Gly indicates that the strains were cultivated on 1% glycerol for 24 hours. Cel indicates that the strains were initially cultivated on 1% glycerol for 24 hours, then transferred to fresh media containing 1% cellulose and incubated for an additional 72 hours.

**Figure S2**

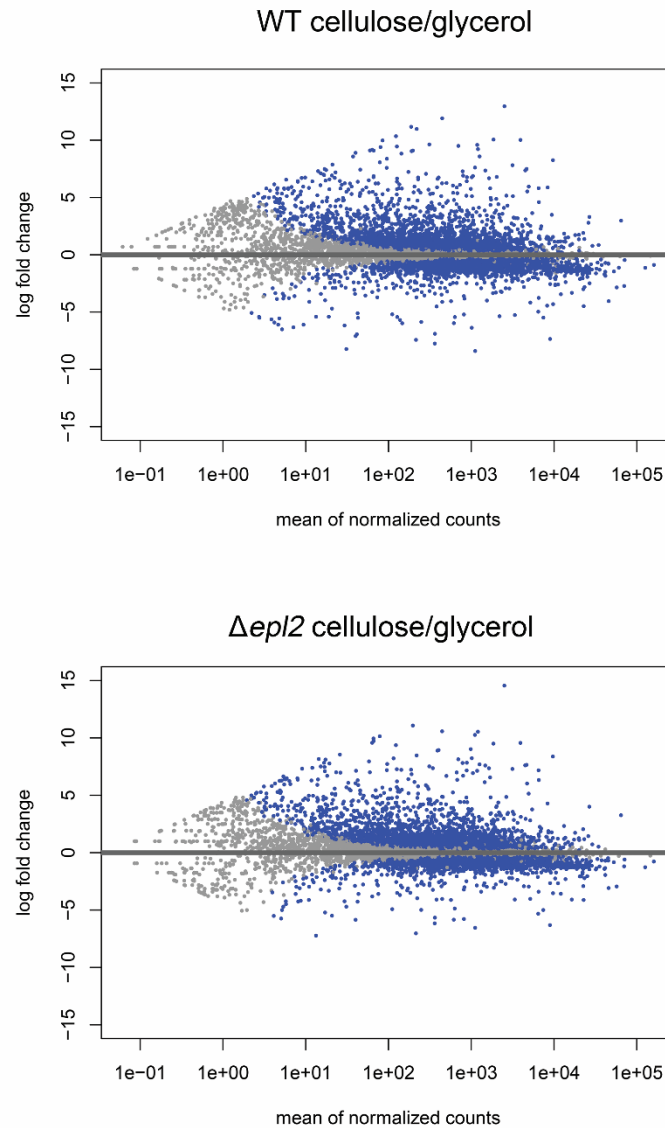

**Figure S2.** Differentially expressed genes in wild type (WT) and  $\Delta epI2$  strains. The expression profile was generated for growth on 1% cellulose for 72 hours in relation to 1% glycerol for 24 hours. Genes that exhibit differential expression are represented in blue, while all other genes of the genome are depicted in gray.

**Figure S3**

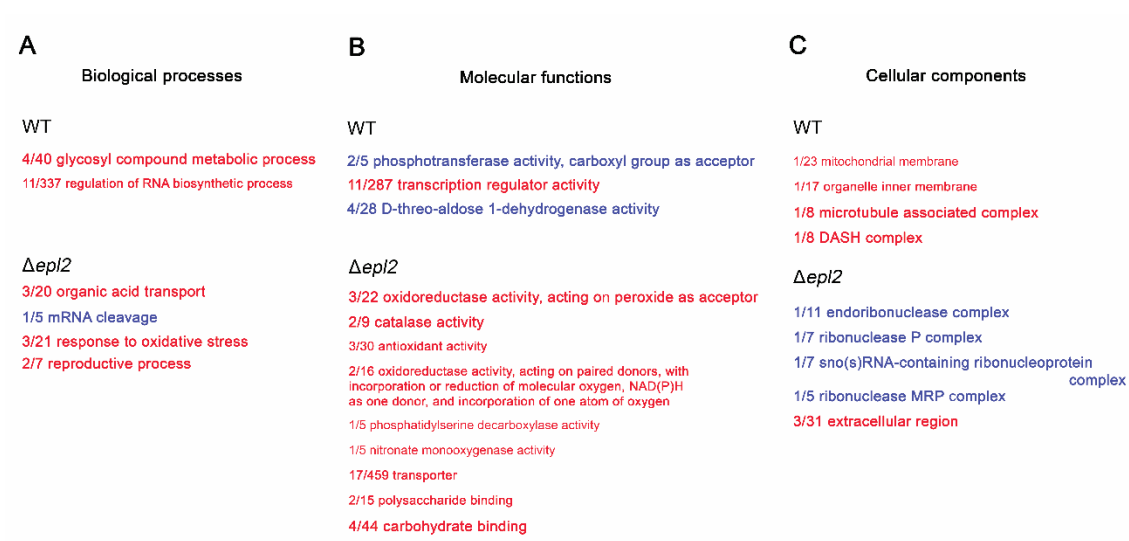

**Figure S3.** Gene Ontology enrichment analysis of WT and  $\Delta epI2$  strains. Biological processes (A), Molecular functions (B), and Cellular compartments (C) involved in the growth of WT and  $\Delta epI2$  strains on 1% cellulose compared to 1% glycerol. Upregulated processes are represented in red, while downregulated processes are shown in blue. The fractions before each category indicate the number of regulated genes relative to the total number of *T. reesei* genes in that category. All processes shown have a statistical significance of  $p < 0.05$ .

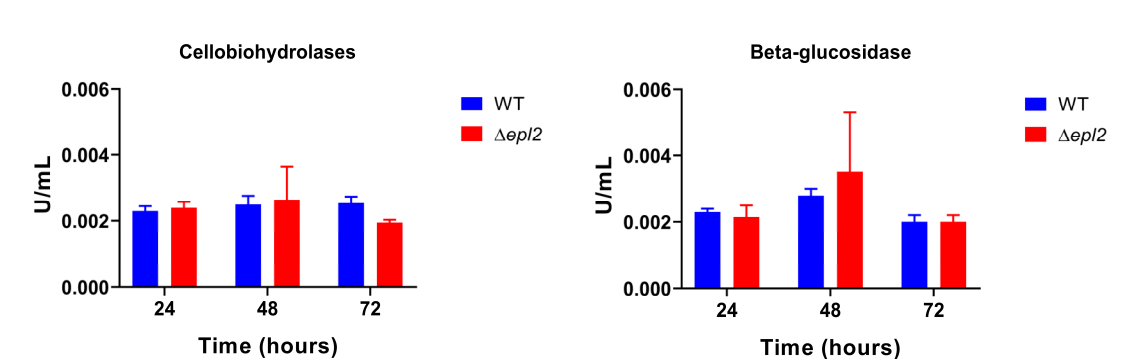

**Figure S4:** Enzymatic activity of WT and  $\Delta epI2$  strains grown on cellulose. No significant changes were observed

## Supplementary tables

**Table S1:** Proteins used to infer the cladogram.

| Protein (NCBI ID, JGI ID)      | Organism                        | Reference (DOI)                  |
|--------------------------------|---------------------------------|----------------------------------|
| EPL1 (XP_013937770.1)          | <i>Trichoderma atroviride</i>   | 10.1074/jbc.M112.427633          |
| EPL2 (XP_013944228.1)          |                                 | 10.3389/fpls.2015.00077          |
| EPL3 (XP_013937568.1)          |                                 |                                  |
| Sm1 (XP_013959806.1)           | <i>Trichoderma virens</i>       | 10.1094/MPMI-19-0838             |
| Sm2 (XP_013954872.1)           |                                 | 10.3389/fpls.2015.00077          |
| Sm3 (XP_013960015.1)           |                                 | 10.1186/s12866-014-0333-0        |
| Epl1-Tas (JN966996)            | <i>Trichoderma asperellum</i>   | 10.1038/s41598-018-26328-1       |
| Epl (XP_024761368.1)           |                                 |                                  |
| Epl (XP_024761426.1)           |                                 |                                  |
| Epl (XP_024760848.1)           |                                 |                                  |
| Epl-1 (XP_024774373.1, 508110) | <i>Trichoderma harzianum</i>    | 10.1038/srep17998                |
| Epl (XP_024774126.1)           |                                 |                                  |
| Epl (XP_024771835.1)           |                                 |                                  |
| EPL (XP_006970000.1, 82662)    | <i>Trichoderma reesei</i>       | This study                       |
| EPL (XP_006969009.1, 111449)   |                                 |                                  |
| EPL2 (XP_006969193.1, 123955)  |                                 |                                  |
| FgCPP1 (FGSG_10212)            | <i>Fusarium graminearum</i>     | 10.1080/07060661.2022.2044910    |
| BcSpl1 (XP_024547455.1)        | <i>Botrytis cinerea</i>         | 10.1111/j.1469-8137.2011.03802.x |
| Bcspl2 (XP_001552257.1)        |                                 |                                  |
| Sscpl (XP_001588549.1)         | <i>Sclerotinia sclerotiorum</i> | 10.1111/nph.14842                |

|                    |                               |                                  |
|--------------------|-------------------------------|----------------------------------|
| MSP1 (XP_359969.1) | <i>Magnaporthe oryzae</i>     | 10.1111/j.1574-6968.2007.00796.x |
| CP (EF017218)      | <i>Ceratocystis platani</i>   | 10.1111/j.1574-6968.2011.02475.x |
| SP1 (AAM33130.1)   | <i>Leptosphaeria maculans</i> | 10.1007/s10658-005-3168-6        |

**Table S2:** Primer sequences used in this study.

| Amplified fragment                      | Sequence                                                   |
|-----------------------------------------|------------------------------------------------------------|
| pRS426_5' UTR <i>epl1</i> Forward       | 5'<br>GTAACGCCAGGGTTTTCCCATCGCGTCTTGGGCGGAAC<br>TT 3'      |
| <i>pyr4</i> _5' UTR <i>epl1</i> Reverse | 5'GCGGGAGAGTCTGGATAGCTCGAAGGCAGGAGAA<br>AAGCACAAAGAAGAG 3' |
| <i>pyr4</i> _3' UTR <i>epl1</i> Forward | 5'GTCGACGATATCAGCTTCCATATCCCGTCTTATTCC<br>CAATGTTG 3'      |
| pRS426_3' UTR <i>epl1</i> Reverse       | 5'GGAAACAGCTCATCTTCTCGTCGACAACCGCGGATA<br>ACAATTCACACA 3'  |
| <i>pyr4</i> Forward                     | 5'CCTTCGAGCTATCCAGACTCTCCCTTGCCTTGTCTTGT<br>CTGGGTT 3'     |
| <i>pyr4</i> Reverse                     | 5'CAACATTGGGAATAAGACGGGCGGTTGATTGTTGCC<br>GTCCGTTTC 3'     |
| <i>epl1</i> Forward                     | 5' CAACTCGCCCAATTGTTGACGG 3'                               |
| <i>epl1</i> Reverse                     | 5' GGTGTCGGGGAAAACAGAGA 3'                                 |

**Table S3:** Primers used in RT-qPCR experiments.

| Protein ID | Name                                         | 5' → 3' (Forward)           | 3' → 5' (Reverse)          |
|------------|----------------------------------------------|-----------------------------|----------------------------|
| 123955     | <i>epl1</i>                                  | CGGTACAACCTGCCACTC<br>G     | GAGCACGATACACTAGC<br>CAAG  |
| 73643      | beta-1,6-N-acetylglucosaminyltransferase     | GCCACAAGAATGCTACG<br>AATG   | GTCCAGGGATGATGTAG<br>TTGAG |
| 69700      | alpha-N-acetylglucosaminidase                | CGCATGGTTGAGCTAGG<br>TATAA  | GGAGAGGCCAAATCCA<br>GAAA   |
| 71532      | glucan endo-1,3-alpha-glucosidase            | CCGATCTCGTGGAACCTC<br>ATTAC | GCCCTGTTGGTAGTTCT<br>GTATC |
| 59791      | Chitinase                                    | GATTCAACAACACGGCT<br>ACAAC  | TCCCAAGCCTGTCCTAC<br>TAA   |
| 79671      | N-acetyl-glucosamine-6-phosphate deacetylase | ACATCCTACAATCCCAC<br>CATTAC | CGTCTGTTTCTCGGACA<br>AGAT  |

|        |                                       |                            |                             |
|--------|---------------------------------------|----------------------------|-----------------------------|
| 123639 | Glycoside Hydrolase<br>Family 64      | CCCTCTCTCATCACAAG<br>AGTT  | GACAGCCTTTCCTTCGG<br>TATAG  |
| 123726 | Glycoside Hydrolase<br>Family 16      | GCAACCTCAACGTCAAC<br>AAC   | GGAACCAGTGATCTGGA<br>AGAAG  |
| 108672 | glucan endo-1,3-alpha-<br>glucosidase | GTCCGGTGTTAACCCTT<br>ACTT  | GACGTGCTCATCCTCGA<br>TATAC  |
| 54242  | Glycoside Hydrolase<br>Family 55      | ACAGCGGCTTCACCATT<br>AG    | GGACCAGAAGTTGTCGA<br>TGTAAG |
| 72567  | Cel6A                                 | ACAAGAATGCATCGTCT<br>CCG   | TGTTCCACCCGTTGTAG<br>TTG    |
| 123989 | Cel7a                                 | CCGAGCTTGGTAGTTAC<br>TCTG  | GGTAGCCTTCTTGACTG<br>AGT    |
| 49081  | Cel74a                                | CGGTTGTATCGTACCTA<br>TTCCG | TGATGTCTTTCCAAGTT<br>CCCC   |
| 76672  | Cel3a                                 | CTGTACATCACCTACCC<br>ATC   | TAGCTGAGATCTCGTCG<br>TC     |

**Table S4:** Summary of reads obtained by RNA Sequencing

| Sample                   | Raw Reads  | Mapped Reads | % Mapped Reads |
|--------------------------|------------|--------------|----------------|
| WT Glycerol 1            | 14.925.755 | 14.633.646   | 98.04          |
| WT Glycerol 2            | 14.333.019 | 14.109.929   | 98.44          |
| WT Glycerol 3            | 15.515.433 | 15.291.320   | 98.56          |
| <i>Δep12</i> Glycerol 1  | 16.542.757 | 16.309.899   | 98.59          |
| <i>Δep12</i> Glycerol 2  | 14.657.347 | 14.463.704   | 98.68          |
| <i>Δep12</i> Glycerol 3  | 15.545.576 | 15.310.844   | 98.49          |
| WT Cellulose 1           | 16.106.435 | 15.870.387   | 98.53          |
| WT Cellulose 2           | 12.982.812 | 12.778.157   | 98.42          |
| WT Cellulose 3           | 13.774.576 | 13.587.729   | 98.64          |
| <i>Δep12</i> Cellulose 1 | 12.829.839 | 12.643.452   | 98.55          |
| <i>Δep12</i> Cellulose 2 | 12.761.500 | 12.572.948   | 98.52          |
| <i>Δep12</i> Cellulose 3 | 14.061.109 | 13.861.279   | 98.58          |
